# Supplementary material
Source: PubMed Central journal article supplement (PMC4139460)
Supplement: NIHMS607444-supplement-01.pdf [file NIHMS607444-supplement-01.pdf]

**SUPPLEMENTARY FIGURE LEGEND**

**Supplementary Figure 1. Kv2.1 clusters are juxtaposed to clusters of RyR in striatal neurons.** Mouse brain sections were double immunofluorescence labeled for Kv2.1 (green) and RyR (red). High-resolution images of the striatum were acquired with Zeiss Elyra system (SR-SIM) and Z-stacks were reconstructed using Zen software. Three dimensional representations were rotated and perspectives magnified and recorded using Zen software.

Super-resolution imaging of double label immunofluorescence of striatal medium spiny neurons demonstrates the juxtaposed clustering of the plasma membrane Kv2.1 voltage-gated K<sup>+</sup> channel (magenta) and ryanodine receptor (RyR) intracellular Ca<sup>2+</sup>-release channels (green).

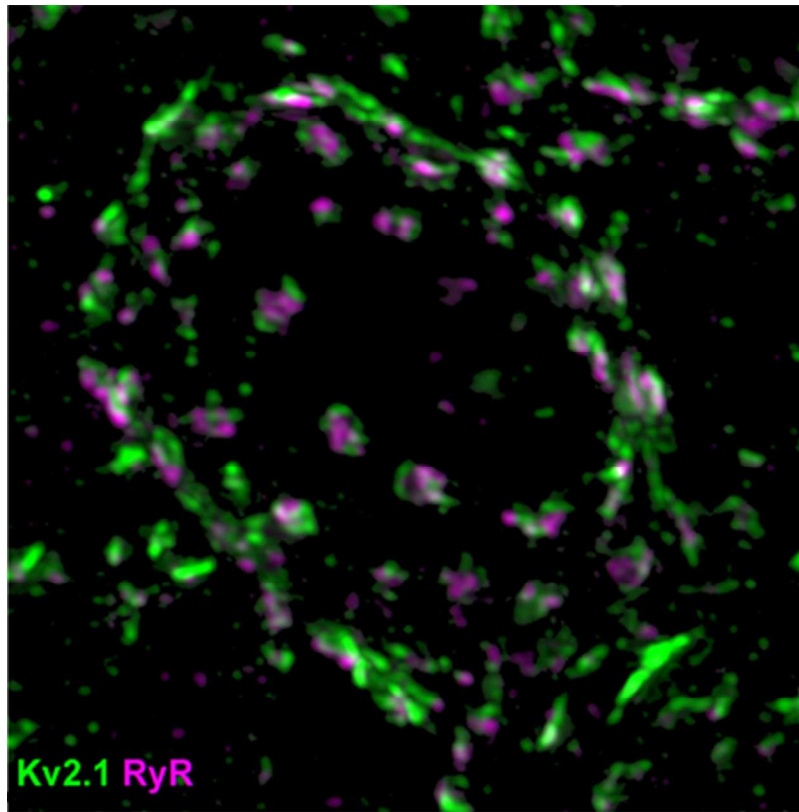

Super-resolution imaging of double label immunofluorescence of striatal medium spiny neurons demonstrates the juxtaped clustering of the plasma membrane Kv2.1 voltage-gated K<sup>+</sup> channel (magenta) and ryanodine receptor (RyR) intracellular Ca<sup>2+</sup>-release channels (green).  
141x142mm (72 x 72 DPI)
